# Supplementary material for: Safety and Efficacy of Axicabtagene Ciloleucel versus Standard of Care in Patients 65 Years of Age or Older with Relapsed/Refractory Large B-Cell Lymphoma
Source: PubMed Central journal article supplement — Clin Cancer Res. 2023 Mar 31;29(10):1894–905. doi: 10.1158/1078-0432.CCR-22-3136 (PMC10183830; doi:10.1158/1078-0432.ccr-22-3136), 2023-03-31
Supplement: ccr-22-3136_supplementary_figure_s2_suppfs2.pdf [file ccr-22-3136_supplementary_figure_s2_suppfs2.pdf]

**Supplementary Figure S2. Overall survival (interim) and progression-free survival in patients ≥70 years**

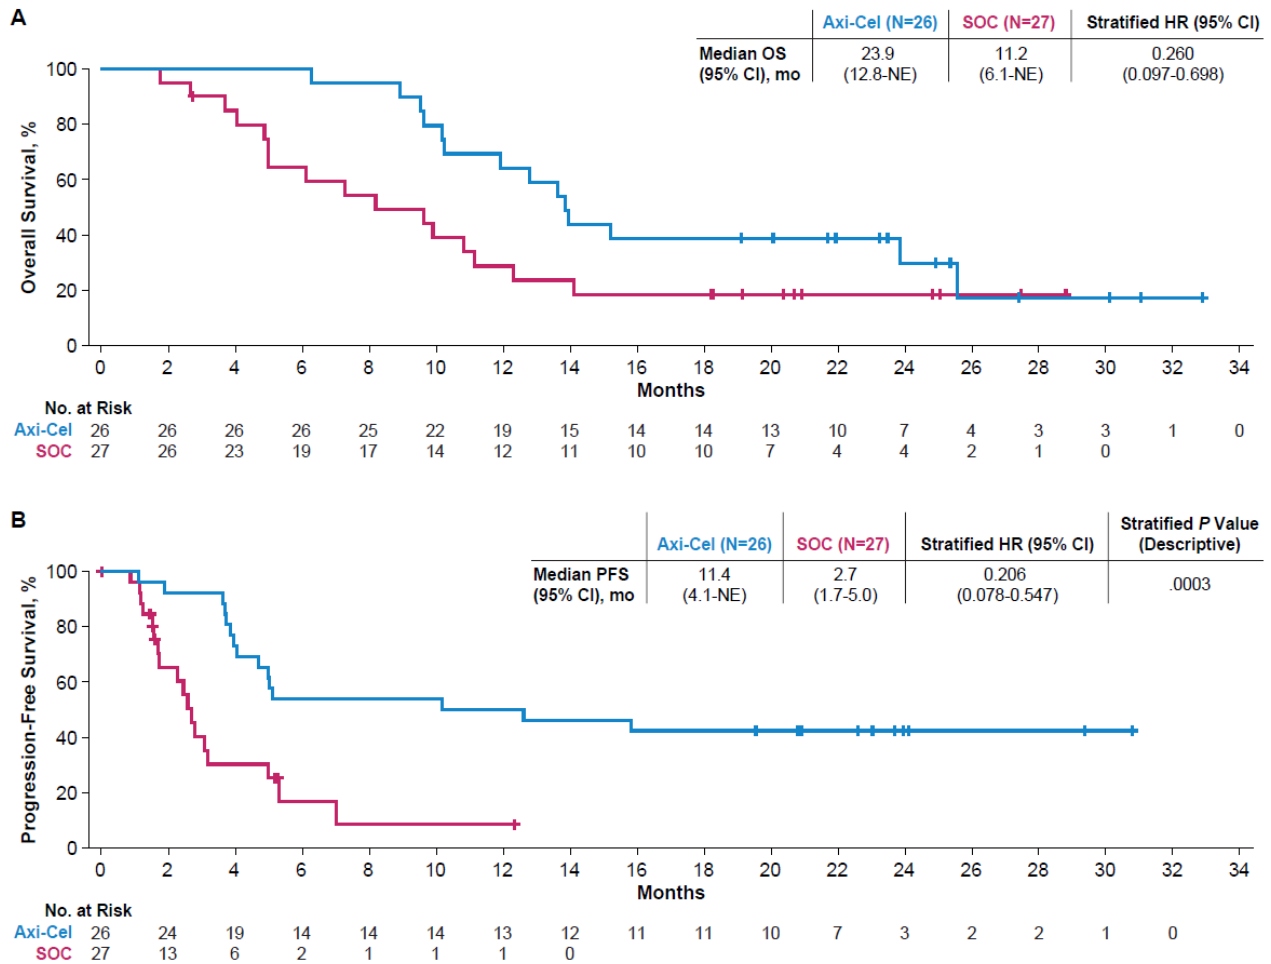

Panel A shows the Kaplan-Meier estimate of OS in patients ≥70 years. Panel B shows the Kaplan-Meier estimate for PFS as assessed by investigator in patients ≥70 years.

Abbreviations: Axi-cel, axicabtagene ciloleucel; HR, hazard ratio; NE, not evaluable; OS, overall survival; PFS, progression-free survival; SOC, standard of care.
