# Supplementary material for: Safety and Efficacy of Axicabtagene Ciloleucel versus Standard of Care in Patients 65 Years of Age or Older with Relapsed/Refractory Large B-Cell Lymphoma
Source: PubMed Central journal article supplement — Clin Cancer Res. 2023 Mar 31;29(10):1894–905. doi: 10.1158/1078-0432.CCR-22-3136 (PMC10183830; doi:10.1158/1078-0432.ccr-22-3136), 2023-03-31
Supplement: ccr-22-3136_supplementary_figure_s3_suppfs3.pdf [file ccr-22-3136_supplementary_figure_s3_suppfs3.pdf]

**Supplementary Figure S3. Sensitivity analysis of interim overall survival in patients  $\geq 65$  years**

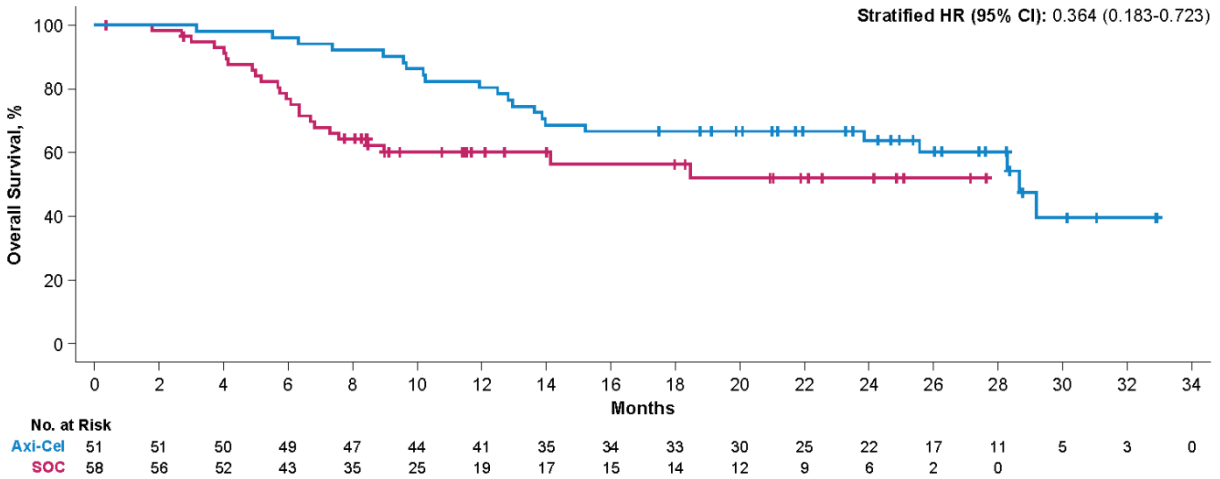

Figure shows the Kaplan-Meier estimate of interim sensitivity OS in patients  $\geq 65$  years. Interim sensitivity analysis was conducted using the rank preserving structure failure time model.(1) Abbreviations: axi-cel, axicabtagene ciloleucel; OS, overall survival; SOC, standard of care.

1. Robins JM, Tsiatis AA. Correcting for non-compliance in randomized trials using rank preserving structural failure time models. *Commun Stat* **1991**;20(8):2609-31.
