# Supplementary material for: Safety and Efficacy of Axicabtagene Ciloleucel versus Standard of Care in Patients 65 Years of Age or Older with Relapsed/Refractory Large B-Cell Lymphoma
Source: PubMed Central journal article supplement — Clin Cancer Res. 2023 Mar 31;29(10):1894–905. doi: 10.1158/1078-0432.CCR-22-3136 (PMC10183830; doi:10.1158/1078-0432.ccr-22-3136), 2023-03-31
Supplement: ccr-22-3136_supplementary_figure_s5_suppfs5.pdf [file ccr-22-3136_supplementary_figure_s5_suppfs5.pdf]

### Supplementary Figure S5. CAR T-cell levels in patients $\geq 65$ years

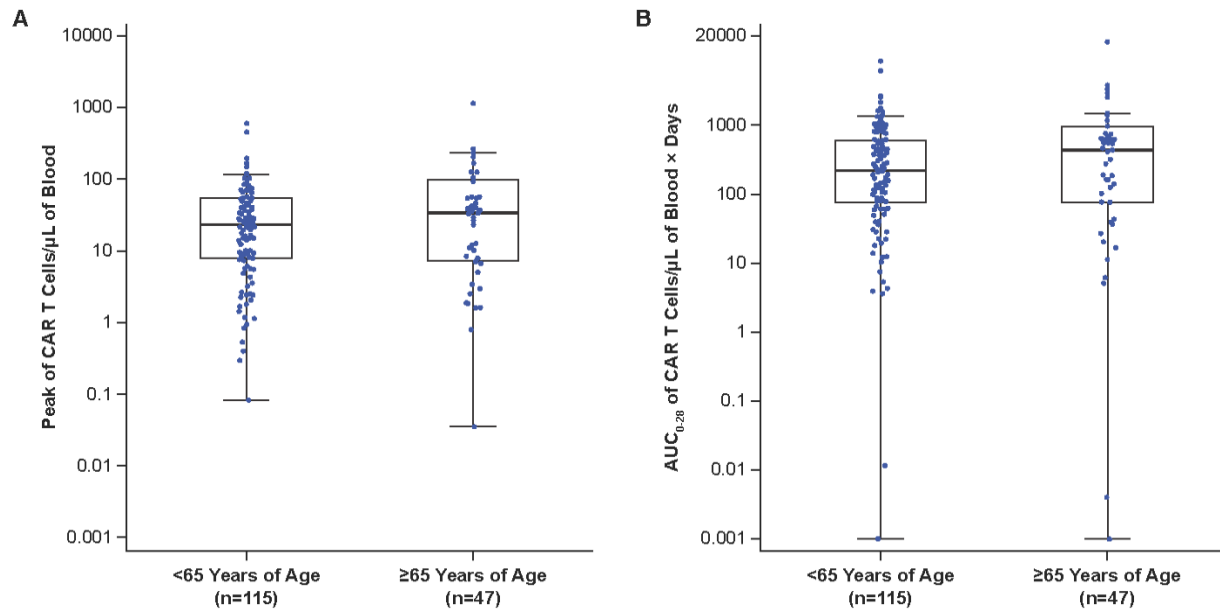

| Parameter,<br>median (Q1- Q3)                            | Axi-Cel<br>N=170            |                                  | P Value <sup>a</sup> |
|----------------------------------------------------------|-----------------------------|----------------------------------|----------------------|
|                                                          | <65 Years of Age<br>(n=115) | $\geq 65$ Years of Age<br>(n=47) |                      |
| Peak (cells/ $\mu\text{L}$ )                             | 23.45 (8.15-55.91)          | 34.80 (7.35-103.36)              | 0.2619               |
| $\text{AUC}_{0-28}$ (cells/ $\mu\text{L}$ $\times$ days) | 218.84 (76.36-601.99)       | 445.11 (76.32-969.81)            | 0.2010               |

Figure shows CAR T-cell peak and area under the curve from 0 to 28 days following axi-cel infusion. Statistical analysis was conducted using the Wilcoxon rank-sum. <sup>a</sup> Reported *P* values are descriptive.

Abbreviations:  $\text{AUC}_{0-28}$ , area under the curve from day 0 to 28; axi-cel, axicabtagene ciloleucel; CAR, chimeric antigen receptor.
