# Supplementary material for: Safety and Efficacy of Axicabtagene Ciloleucel versus Standard of Care in Patients 65 Years of Age or Older with Relapsed/Refractory Large B-Cell Lymphoma
Source: PubMed Central journal article supplement — Clin Cancer Res. 2023 Mar 31;29(10):1894–905. doi: 10.1158/1078-0432.CCR-22-3136 (PMC10183830; doi:10.1158/1078-0432.ccr-22-3136), 2023-03-31
Supplement: ccr-22-3136_supplementary_tables_s1-s11_suppts1-ts11.pdf [file ccr-22-3136_supplementary_tables_s1-s11_suppts1-ts11.pdf]

**Supplementary Table S1. Patient-reported outcomes instruments**

| Instrument    | Description                                                                                               | Scales/Domains                                                                                                                                                                                                                                                                       |
|---------------|-----------------------------------------------------------------------------------------------------------|--------------------------------------------------------------------------------------------------------------------------------------------------------------------------------------------------------------------------------------------------------------------------------------|
| EORTC QLQ-C30 | Cancer-specific 30-item questionnaire including global health status, functional, and symptom scales(1,2) | <ul style="list-style-type: none"><li>• Functional scales: physical, role, emotional, cognitive, and social functioning</li><li>• Symptom scales: fatigue, nausea and vomiting, pain, dyspnea, insomnia, appetite loss, constipation, diarrhea, and financial difficulties</li></ul> |
| EQ-5D-5L      | General questionnaire with 5 QoL domains plus a global assessment(1,2)                                    | <ul style="list-style-type: none"><li>• Mobility, self-care, usual activities, pain/discomfort, and anxiety/depression</li><li>• VAS rating of global assessment of their current (day of assessment) state of health</li></ul>                                                      |

Abbreviations: EORTC, European Organization for Research and Treatment of Cancer; EQ-5D-5L, EuroQol 5-dimension questionnaire using a 5-level scale; QoL, quality of care; VAS, visual analogue scale.

1. Aaronson NK, Ahmedzai S, Bergman B, Bullinger M, Cull A, Duez NJ, *et al*. The European Organization for Research and Treatment of Cancer QLQ-C30: a quality-of-life instrument for use in international clinical trials in oncology. *J Natl Cancer Inst* **1993**;85(5):365-76.

2. Fayers P, Aaronson N, Bjordal K, MGroenvold, Curran D, Bottomley A, *et al*. The EORTC QLQ-C30 Scoring Manual (3rd Edition). Brussels: European Organisation for Research and Treatment of Cancer; 2001.

**Supplementary Table S2. Axi-cel delivery and administration time**

| <b>Median (range), days</b>                        | <b>Axi-Cel (<i>n</i> = 49)</b> |
|----------------------------------------------------|--------------------------------|
| Leukapheresis to axi-cel release                   | 12 (10-19)                     |
| Leukapheresis to delivery of axi-cel at study site | 18 (13-49)                     |
| Leukapheresis to axi-cel administration            | 25 (17-52)                     |

Abbreviations: axi-cel, axicabtagene ciloleucel.

**Supplementary Table S3. Summary of efficacy and safety outcomes in patients ≥65 years versus all patients in ZUMA-7**

| Outcome                                         | All Patients   |               | Patients ≥65 Years |               |
|-------------------------------------------------|----------------|---------------|--------------------|---------------|
|                                                 | Axi-Cel        | SOC           | Axi-Cel            | SOC           |
| EFS, median (95% CI), months                    | 8.3 (4.5-15.8) | 2.0 (1.6-2.8) | 21.5 (5.0-NE)      | 2.5 (1.6-3.2) |
| ORR, %                                          | 83             | 50            | 88                 | 52            |
| CR rate, %                                      | 65             | 32            | 75                 | 33            |
| 24-months OS rate, %                            | 61             | 52            | 64                 | 50            |
| PFS, median (95% CI), months                    | 14.7 (5.4-NE)  | 3.7 (2.9-5.3) | 21.5 (5.1-NE)      | 5.0 (2.8-7.3) |
| Grade ≥3 treatment-emergent AEs, <i>n/N</i> (%) | 155/170 (91)   | 140/168 (83)  | 46/49 (94)         | 45/55 (82)    |
| Grade ≥3 CRS, <i>n/N</i> (%)                    | 11/170 (6)     | -             | 4/49 (8)           | -             |
| Grade ≥3 neurologic events, <i>n/N</i> (%)      | 36/170 (21)    | 1/168 (1)     | 13/49 (27)         | 1/55 (2)      |

Abbreviations: AE, adverse event; axi-cel, axicabtagene ciloleucel; CR, complete response; CRS, cytokine release syndrome; EFS, event-free survival; NE, not evaluable; ORR, objective response rate; OS, overall survival; PFS, progression-free survival; SOC, standard of care.

**Supplementary Table S4. Serious adverse events in at least 3 patients in patients ≥65 years**

| <i>n</i> (%)                  | Axi-Cel<br><i>n</i> = 49 |          | SOC<br><i>n</i> = 55 |          |
|-------------------------------|--------------------------|----------|----------------------|----------|
|                               | Any Grade                | Grade ≥3 | Any Grade            | Grade ≥3 |
| Any serious adverse event     | 29 (59)                  | 25 (51)  | 26 (47)              | 23 (42)  |
| Pyrexia                       | 12 (24)                  | 1 (2)    | 2 (4)                | 0        |
| Hypotension                   | 6 (12)                   | 2 (4)    | 1 (2)                | 1 (2)    |
| Pneumonia                     | 4 (8)                    | 4 (8)    | 3 (5)                | 3 (5)    |
| Acute kidney injury           | 1 (2)                    | 0        | 5 (9)                | 3 (5)    |
| Encephalopathy                | 6 (12)                   | 4 (8)    | 0                    | 0        |
| Febrile neutropenia           | 0                        | 0        | 6 (11)               | 6 (11)   |
| Neutropenia <sup>a</sup>      | 4 (8)                    | 3 (6)    | 2 (4)                | 2 (4)    |
| Sepsis                        | 1 (2)                    | 1 (2)    | 3 (5)                | 3 (5)    |
| Anemia                        | 1 (2)                    | 1 (2)    | 2 (4)                | 2 (4)    |
| Confusional state             | 3 (6)                    | 2 (4)    | 0                    | 0        |
| Dyspnea                       | 2 (4)                    | 2 (4)    | 1 (2)                | 1 (2)    |
| Hypoxia                       | 2 (4)                    | 0        | 1 (2)                | 1 (2)    |
| Sinus tachycardia             | 2 (4)                    | 1 (2)    | 1 (2)                | 0        |
| Somnolence                    | 3 (6)                    | 2 (4)    | 0                    | 0        |
| Thrombocytopenia <sup>b</sup> | 0                        | 0        | 3 (5)                | 3 (5)    |

The severity of all adverse events was graded with the use of the Common Terminology Criteria for Adverse Events, version 4.03, of the National Cancer Institute.

<sup>a</sup> Neutropenia refers to the combined preferred terms of neutropenia and neutrophil count decreased.

<sup>b</sup> Thrombocytopenia refers to the combined preferred terms of thrombocytopenia and platelet count decreased.

Abbreviations: axi-cel, axicabtagene ciloleucel; SOC, standard of care.

**Supplementary Table S5. Summary of cytopenias present on or after 90 days from initiation of definitive therapy on protocol in patients ≥65 years<sup>a</sup>**

| <i>n</i> (%)                       | Axi-Cel<br><i>n</i> = 49 |          | SOC Patients Who Proceeded<br>to ASCT<br><i>n</i> = 20 |          |
|------------------------------------|--------------------------|----------|--------------------------------------------------------|----------|
|                                    | Any Grade                | Grade ≥3 | Any Grade                                              | Grade ≥3 |
| Any prolonged cytopenia            | 14 (29)                  | 6 (12)   | 5 (25)                                                 | 2 (10)   |
| Prolonged thrombocytopenia         | 6 (12)                   | 0        | 2 (10)                                                 | 0        |
| Platelet count decreased           | 5 (10)                   | 0        | 2 (10)                                                 | 0        |
| Thrombocytopenia <sup>b</sup>      | 1 (2)                    | 0        | 0                                                      | 0        |
| Prolonged neutropenia <sup>c</sup> | 8 (16)                   | 5 (10)   | 1 (5)                                                  | 1 (5)    |
| Neutrophil count decreased         | 4 (8)                    | 3 (6)    | 0                                                      | 0        |
| Neutropenia                        | 4 (8)                    | 2 (4)    | 1 (5)                                                  | 1 (5)    |
| Febrile neutropenia                | 0                        | 0        | 0                                                      | 0        |
| Prolonged anemia <sup>d</sup>      | 7 (14)                   | 1 (2)    | 2 (10)                                                 | 1 (5)    |
| Anemia                             | 6 (12)                   | 1 (2)    | 2 (10)                                                 | 1 (5)    |
| Anemia macrocytic                  | 1 (2)                    | 0        | 0                                                      | 0        |
| Hematocrit decreased               | 0                        | 0        | 0                                                      | 0        |
| Hemoglobin decreased               | 0                        | 0        | 0                                                      | 0        |

<sup>a</sup> 90 days from receipt of axi-cel infusion or the first dose of high-dose therapy. <sup>b</sup> Thrombocytopenia was identified with SMQ hematopoietic thrombocytopenia (narrow). <sup>c</sup> Neutropenia was identified using the MedDRA preferred terms of neutropenia, neutrophil count decreased, and febrile neutropenia. <sup>d</sup> Anemia was identified using the SMQ hematopoietic erythropenia (broad). Multiple instances of the same adverse event in one patient are counted once at the worst grade for each patient. Adverse events started on or after high-dose therapy were included. Adverse events were coded using MedDRA version 23.1 and graded per CTCAE version 4.03.

Abbreviations: ASCT, autologous stem cell transplant; axi-cel, axicabtagene ciloleucel; CTCAE, Common Terminology Criteria for Adverse Events; MedDRA, Medical Dictionary for Regulatory Activities; SMQ, Standardized MedDRA Queries; SOC, standard of care.

**Supplementary Table S6. Deaths in axi-cel and SOC arms for patients ≥65 years (safety analysis set)**

| <b>Reason for death, <i>n</i> (%)</b>       | <b>Axi-Cel<br/><i>n</i> = 49</b> | <b>SOC<br/><i>n</i> = 55</b> |
|---------------------------------------------|----------------------------------|------------------------------|
| <b>Progressive disease</b>                  | 19 (39)                          | 20 (36)                      |
| <b>Fatal adverse event</b>                  | 1 (2)                            | 1 (2) <sup>a</sup>           |
| COVID-19                                    | 1 (2)                            | 0                            |
| <b>Definitive therapy-related mortality</b> | 0                                | 1 (2) <sup>a</sup>           |
| <b>Other<sup>b</sup></b>                    | 1 (2)                            | 5 (9)                        |
| COVID-19                                    | 0                                | 2 (4)                        |

<sup>a</sup> Due to cardiac arrest. <sup>b</sup> Other reasons for death included natural progression from prior subdural hematoma (*n* = 1) in the axi-cel arm and COVID-19 (*n* = 2), cardiopulmonary arrest (*n* = 1), urosepsis (*n* = 1), and sepsis (*n* = 1) in the SOC arm.

Abbreviations: axi-cel, axicabtagene ciloleucel; SOC, standard of care.

**Supplementary Table S7. Summary of serum analytes in patients <65 years versus ≥65 years in the axi-cel arm (N = 170)**

| Serum Analyte        | <65 Years of Age<br>(n = 121) |                              | ≥65 Years of Age<br>n = 49 |                             | P value <sup>a</sup> |
|----------------------|-------------------------------|------------------------------|----------------------------|-----------------------------|----------------------|
|                      | n                             | Median (range)               | n                          | Median (range)              |                      |
| CRP (mg/L)           |                               |                              |                            |                             |                      |
| Peak                 | 129                           | 86.0 (3.6-184.0)             | 50                         | 83.7 (8.0-184.0)            | .9269                |
| AUC <sub>0-28</sub>  | 129                           | 1061.4 (27.8-5263.4)         | 50                         | 1043.7 (68.9-2870.1)        | .6538                |
| Baseline             | 121                           | 17.1 (0.2-184.0)             | 49                         | 10.6 (0.7-184.0)            | .4318                |
| CXCL10 (pg/mL)       |                               |                              |                            |                             |                      |
| Peak                 | 129                           | 1740.1 (386.9-9535.3)        | 50                         | 2289.4 (508.4-19,360.0)     | .0146                |
| AUC <sub>0-28</sub>  | 129                           | 31723.3 (2967.7-140,224.1)   | 50                         | 35,468.7 (8611.0-178,430.0) | .1097                |
| Baseline             | 121                           | 452.1 (145.8-2760.6)         | 49                         | 576.3 (185.9-3640.0)        | .0742                |
| Ferritin (ng/mL)     |                               |                              |                            |                             |                      |
| Peak                 | 128                           | 559.5 (67.0-82,900.0)        | 50                         | 747.5 (107.0-12,544.0)      | .0411                |
| AUC <sub>0-28</sub>  | 128                           | 11,197.0 (637.0-1,104,878.5) | 50                         | 15,405.5 (1370.5-114,409.5) | .1161                |
| Baseline             | 119                           | 239.0 (1.0-4656.0)           | 49                         | 274.0 (21.0-1593.0)         | .3399                |
| Granzyme B (pg/mL)   |                               |                              |                            |                             |                      |
| Peak                 | 129                           | 44.5 (3.3-605.0)             | 50                         | 47.3 (17.7-2379.5)          | .4253                |
| AUC <sub>0-28</sub>  | 129                           | 692.9 (39.8-12,968.0)        | 50                         | 829.1 (98.6-17,722.2)       | .6866                |
| Baseline             | 121                           | 9.1 (3.3-414.0)              | 48                         | 8.9 (3.3-50.8)              | .9482                |
| ICAM-1 (ng/mL)       |                               |                              |                            |                             |                      |
| Peak                 | 129                           | 791.9 (405.4-2925.5)         | 50                         | 901.7 (424.6-3584.9)        | .0749                |
| AUC <sub>0-28</sub>  | 129                           | 20,318.2 (3304.2-62,508.7)   | 50                         | 20,873.3 (5681.6-63,199.9)  | .5704                |
| Baseline             | 121                           | 584.0 (333.0-2622.1)         | 49                         | 569.0 (369.5-1834.7)        | .9753                |
| IFN-γ (pg/mL)        |                               |                              |                            |                             |                      |
| Peak                 | 129                           | 227.9 (9.7-23,360.0)         | 50                         | 432.1 (56.1-23,360.0)       | .0135                |
| AUC <sub>0-28</sub>  | 129                           | 1854.4 (47.7-315,565.1)      | 50                         | 3241.4 (432.9-168,014.5)    | .0784                |
| Baseline             | 121                           | 9.3 (1.4-288.1)              | 49                         | 12.7 (1.4-160.3)            | .1418                |
| IL-1 RA (pg/mL)      |                               |                              |                            |                             |                      |
| Peak                 | 129                           | 996.0 (237.0-12,954.0)       | 50                         | 1206.0 (401.8-16,000.0)     | .0566                |
| AUC <sub>0-28</sub>  | 129                           | 20,309.6 (1539.7-218,174.4)  | 50                         | 21,995.9 (4899.9-163,588.7) | .2836                |
| Baseline             | 119                           | 600.8 (140.8-3577.5)         | 48                         | 562.3 (240.9-2585.1)        | .9929                |
| IL-2 (pg/mL)         |                               |                              |                            |                             |                      |
| Peak                 | 129                           | 13.1 (0.4-147.3)             | 50                         | 17.4 (1.4-173.1)            | .0933                |
| AUC <sub>0-28</sub>  | 129                           | 81.9 (2.5-913.4)             | 50                         | 101.9 (23.0-694.4)          | .1312                |
| Baseline             | 121                           | 0.4 (0.4-12.2)               | 49                         | 0.4 (0.4-10.4)              | .7803                |
| IL-2 R alpha (ng/mL) |                               |                              |                            |                             |                      |
| Peak                 | 129                           | 6.6 (1.2-56.2)               | 50                         | 9.3 (1.5-80.0)              | .0062                |
| AUC <sub>0-28</sub>  | 129                           | 120.0 (7.8-960.5)            | 50                         | 158.9 (22.2-1216.0)         | .0611                |
| Baseline             | 121                           | 1.6 (0.5-32.7)               | 48                         | 1.7 (0.4-35.9)              | .9292                |
| IL-6 (pg/mL)         |                               |                              |                            |                             |                      |
| Peak                 | 129                           | 41.8 (1.2-2972.0)            | 50                         | 48.8 (2.2-2972.0)           | .2598                |
| AUC <sub>0-28</sub>  | 129                           | 534.3 (8.6-31,936.4)         | 50                         | 778.7 (37.6-40,636.5)       | .2722                |
| Baseline             | 121                           | 2.9 (0.5-49.8)               | 49                         | 3.2 (0.5-19.6)              | .9698                |
| IL-7 (pg/mL)         |                               |                              |                            |                             |                      |
| Peak                 | 129                           | 38.9 (17.9-129.7)            | 50                         | 34.2 (19.2-62.0)            | .0180                |
| AUC <sub>0-28</sub>  | 129                           | 878.3 (235.1-2132.0)         | 50                         | 711.9 (246.9-1646.8)        | .0015                |
| Baseline             | 121                           | 21.0 (4.7-54.5)              | 49                         | 18.5 (5.3-34.5)             | .0485                |
| IL-8 (pg/mL)         |                               |                              |                            |                             |                      |
| Peak                 | 129                           | 60.3 (18.0-6718.0)           | 50                         | 55.9 (10.8-1046.4)          | .8660                |
| AUC <sub>0-28</sub>  | 129                           | 965.0 (133.4-85,027.0)       | 50                         | 900.8 (160.5-14,495.4)      | .5466                |
| Baseline             | 121                           | 16.5 (4.4-7920.0)            | 49                         | 19.3 (5.2-748.1)            | .1011                |
| IL-10 (pg/mL)        |                               |                              |                            |                             |                      |
| Peak                 | 129                           | 11.2 (0.5-342.3)             | 50                         | 17.3 (2.4-652.9)            | .0733                |
| AUC <sub>0-28</sub>  | 129                           | 150.9 (9.9-4480.7)           | 50                         | 214.6 (25.1-4830.0)         | .1413                |
| Baseline             | 121                           | 0.6 (0.2-101.0)              | 49                         | 0.6 (0.2-54.7)              | .9023                |
| IL-15 (pg/mL)        |                               |                              |                            |                             |                      |
| Peak                 | 129                           | 36.1 (12.7-144.6)            | 50                         | 47.1 (20.5-173.0)           | .0004                |
| AUC <sub>0-28</sub>  | 129                           | 490.3 (129.1-1655.4)         | 50                         | 568.7 (142.9-2093.2)        | .2544                |
| Baseline             | 121                           | 3.1 (3.1-8.3)                | 49                         | 3.1 (3.1-25.4)              | .8854                |
| TNF alpha (pg/mL)    |                               |                              |                            |                             |                      |
| Peak                 | 129                           | 6.2 (2.2-58.4)               | 50                         | 7.3 (3.2-72.1)              | .0797                |
| AUC <sub>0-28</sub>  | 129                           | 136.8 (15.3-1224.4)          | 50                         | 144.7 (43.4-1072.3)         | .4059                |
| Baseline             | 121                           | 3.9 (1.4-83.1)               | 49                         | 3.8 (1.7-91.5)              | .7739                |
| VCAM-1 (ng/mL)       |                               |                              |                            |                             |                      |

| Serum Analyte       | <65 Years of Age<br>(n = 121) |                             | ≥65 Years of Age<br>n = 49 |                             | P value <sup>a</sup> |
|---------------------|-------------------------------|-----------------------------|----------------------------|-----------------------------|----------------------|
|                     | n                             | Median (range)              | n                          | Median (range)              |                      |
| Peak                | 129                           | 807.1 (358.4-2577.0)        | 50                         | 1103.4 (545.2-2561.4)       | <.0001               |
| AUC <sub>0-28</sub> | 129                           | 20,375.6 (2828.7- 70,016.1) | 50                         | 26,506.2 (6485.1-75,244.0)  | .0023                |
| Baseline            | 121                           | 589.5 (293.0-5409.9)        | 49                         | 706.9 (405.2-3195.5)        | .0005                |
| GM-CSF (pg/mL)      |                               |                             |                            |                             |                      |
| Peak                | 129                           | 1.9 (0.7-213.9)             | 50                         | 2.9 (0.7-31.8)              | .0073                |
| AUC <sub>0-28</sub> | 129                           | 25.3 (4.7-2687.7)           | 50                         | 30.6 (12.7-430.7)           | .0656                |
| Baseline            | 121                           | 0.7 (0.7-2.3)               | 49                         | 0.7 (0.7-0.7)               | .5330                |
| IL-12 P40 (pg/mL)   |                               |                             |                            |                             |                      |
| Peak                | 129                           | 274.6 (61.1-1105.5)         | 50                         | 302.7 (94.5-1885.9)         | .6913                |
| AUC <sub>0-28</sub> | 129                           | 4859.9 (510.1-27,143.8)     | 50                         | 4354.4 (714.6-29,015.9)     | .3689                |
| Baseline            | 121                           | 187.7 (35.3-1328.4)         | 49                         | 203.4 (24.2-3019.4)         | .8177                |
| IL-17 (pg/mL)       |                               |                             |                            |                             |                      |
| Peak                | 129                           | 12.4 (1.5-260.8)            | 50                         | 13.3 (3.7-127.9)            | .7454                |
| AUC <sub>0-28</sub> | 129                           | 155.7 (10.4-3083.1)         | 50                         | 143.4 (55.1-1600.1)         | .9040                |
| Baseline            | 121                           | 3.5 (1.5-98.6)              | 49                         | 4.1 (1.5-58.2)              | .3304                |
| IL-4 (pg/mL)        |                               |                             |                            |                             |                      |
| Peak                | 129                           | 0.2 (0.2-6.1)               | 50                         | 0.2 (0.2-3.8)               | .2045                |
| AUC <sub>0-28</sub> | 129                           | 6.3 (1.3-74.2)              | 50                         | 6.3 (2.3-40.0)              | .8937                |
| Baseline            | 121                           | 0.2 (0.2-0.8)               | 49                         | 0.2 (0.2-0.2)               | .5330                |
| IL-5 (pg/mL)        |                               |                             |                            |                             |                      |
| Peak                | 129                           | 9.4 (0.5-387.4)             | 50                         | 14.1 (0.5-386.1)            | .0537                |
| AUC <sub>0-28</sub> | 129                           | 85.9 (3.6-5247.4)           | 50                         | 153.0 (6.2-5419.2)          | .0872                |
| Baseline            | 121                           | 0.5 (0.5-3.7)               | 49                         | 0.5 (0.5-10.3)              | .8813                |
| MCP-1 (pg/mL)       |                               |                             |                            |                             |                      |
| Peak                | 129                           | 1031.8 (214.3-3606.4)       | 50                         | 1291.6 (390.2-9671.4)       | .0846                |
| AUC <sub>0-28</sub> | 129                           | 13,575.9 (2349.2-60,160.8)  | 50                         | 14,066.1 (5897.5-142,020.6) | .8710                |
| Baseline            | 121                           | 295.0 (92.8-17,184.0)       | 49                         | 326.3 (69.5-737.8)          | .6949                |
| MCP-4 (pg/mL)       |                               |                             |                            |                             |                      |
| Peak                | 129                           | 176.9 (71.3-507.2)          | 50                         | 194.2 (67.4-755.1)          | .1193                |
| AUC <sub>0-28</sub> | 129                           | 3903.6 (388.8-9057.5)       | 50                         | 3918.7 (1091.4-17,931.6)    | .5814                |
| Baseline            | 121                           | 108.3 (42.3-294.3)          | 49                         | 124.7 (39.1-341.0)          | .2105                |
| MDC (pg/mL)         |                               |                             |                            |                             |                      |
| Peak                | 129                           | 1127.0 (382.0-37,153.0)     | 50                         | 1226.0 (382.0-24,330.0)     | .5282                |
| AUC <sub>0-28</sub> | 129                           | 21,935.0 (2674.0-651,744.0) | 50                         | 20,252.0 (5799.0-453,529.0) | .4538                |
| Baseline            | 121                           | 1258.0 (382.0-149,600.0)    | 49                         | 1186.0 (382.0-107,612.0)    | .6103                |
| MIP-1α (pg/mL)      |                               |                             |                            |                             |                      |
| Peak                | 129                           | 41.1 (8.0-2315.9)           | 50                         | 45.6 (23.7-308.9)           | .2368                |
| AUC <sub>0-28</sub> | 129                           | 964.7 (110.4-30,615.4)      | 50                         | 867.0 (279.1-4765.4)        | .6985                |
| Baseline            | 121                           | 26.9 (8.0-1366.6)           | 49                         | 26.0 (8.0-574.9)            | .7935                |
| MIP-1β (pg/mL)      |                               |                             |                            |                             |                      |
| Peak                | 129                           | 255.0 (90.2-2987.5)         | 50                         | 270.7 (78.7-1042.1)         | .3292                |
| AUC <sub>0-28</sub> | 129                           | 4594.0 (671.3-41,014.0)     | 50                         | 4277.7 (1397.2-16,068.5)    | .6354                |
| Baseline            | 121                           | 132.3 (40.9-843.9)          | 49                         | 120.4 (51.7-627.4)          | .2823                |
| SAA (mg/L)          |                               |                             |                            |                             |                      |
| Peak                | 129                           | 184.0 (3.1-184.0)           | 50                         | 184.0 (3.7-184.0)           | .7528                |
| AUC <sub>0-28</sub> | 129                           | 1518.5 (32.7-5890.1)        | 50                         | 1500.6 (31.8-4154.4)        | .6469                |
| Baseline            | 121                           | 16.5 (0.8-184.0)            | 49                         | 12.4 (1.6-184.0)            | .9945                |
| TARC (pg/mL)        |                               |                             |                            |                             |                      |
| Peak                | 129                           | 1604.1 (73.2-50,723.0)      | 50                         | 1609.4 (116.0-10,525.0)     | .7248                |
| AUC <sub>0-28</sub> | 129                           | 26748.1 (1716.4-884,914.3)  | 50                         | 20,803.1 (2524.1-203,873.3) | .3013                |
| Baseline            | 121                           | 513.5 (77.3-52,160.0)       | 49                         | 484.8 (65.5-24,591.9)       | .5426                |

Peak was defined as the maximum post-baseline level of the analyte from baseline to Week 4 post-treatment. AUC measures the total levels of analyte over time, and was defined as the AUC in a plot of levels of analyte against scheduled visit from baseline to Week 4 post-treatment.

<sup>a</sup> Nominal P value based on Wilcoxon rank-sum test.

Abbreviations: AUC, area under the curve; AUC<sub>0-28</sub>, area under the curve from day 0 to 28; axi-cel, axicabtagene ciloleucel; CRP, C-reactive protein; CXCL10, CXC motif chemokine ligand 10; GM-CSF, granulocyte macrophage colony-stimulating factor; ICAM-1, intercellular adhesion molecule 1; IFN, interferon; IL, interleukin; IL-1RA, interleukin-1 receptor antagonist; IL-2Ra, interleukin-2 receptor alpha; MCP, monocyte chemotactic protein; MDC, macrophage-derived chemokine; MIP, macrophage inflammatory protein; SAA, serum amyloid A; TARC, thymus and activation regulated chemokine; TNF, tumor necrosis factor; VCAM, vascular cell adhesion molecule.



**Supplementary Table S8. Most common adverse events, cytokine release syndrome, and neurologic events in patients ≥70 years**

| <i>n</i> (%)                       | Axi-Cel       |          | SOC           |          |
|------------------------------------|---------------|----------|---------------|----------|
|                                    | <i>n</i> = 24 |          | <i>n</i> = 26 |          |
|                                    | Any Grade     | Grade ≥3 | Any Grade     | Grade ≥3 |
| Any adverse event                  | 24 (100)      | 22 (92)  | 26 (100)      | 20 (77)  |
| Pyrexia                            | 23 (96)       | 1 (4)    | 5 (19)        | 0        |
| Neutropenia <sup>a</sup>           | 19 (79)       | 19 (79)  | 9 (35)        | 9 (35)   |
| Nausea                             | 10 (42)       | 1 (4)    | 16 (62)       | 0        |
| Anemia                             | 10 (42)       | 8 (33)   | 15 (58)       | 11 (42)  |
| Thrombocytopenia <sup>b</sup>      | 10 (42)       | 6 (25)   | 17 (65)       | 16 (62)  |
| Leukopenia <sup>c</sup>            | 10 (42)       | 9 (38)   | 3 (12)        | 3 (12)   |
| Fatigue                            | 8 (33)        | 2 (8)    | 12 (46)       | 0        |
| Decreased appetite                 | 8 (33)        | 0        | 8 (31)        | 0        |
| Diarrhea                           | 8 (33)        | 1 (4)    | 8 (31)        | 0        |
| Cough                              | 11 (46)       | 0        | 4 (15)        | 0        |
| Constipation                       | 5 (21)        | 0        | 9 (35)        | 0        |
| Hypokalemia                        | 8 (33)        | 3 (13)   | 6 (23)        | 1 (4)    |
| Hypophosphatemia                   | 11 (46)       | 8 (33)   | 3 (12)        | 2 (8)    |
| Hypotension                        | 12 (50)       | 2 (8)    | 2 (8)         | 1 (4)    |
| Confusional state                  | 12 (50)       | 4 (17)   | 1 (4)         | 0        |
| Hypoxia                            | 9 (38)        | 5 (21)   | 2 (8)         | 1 (4)    |
| Sinus tachycardia                  | 9 (38)        | 1 (4)    | 2 (8)         | 0        |
| Chills                             | 8 (33)        | 0        | 2 (8)         | 0        |
| Edema peripheral                   | 4 (17)        | 0        | 6 (23)        | 0        |
| Headache                           | 5 (21)        | 0        | 4 (15)        | 0        |
| Alanine aminotransferase increased | 6 (25)        | 0        | 2 (8)         | 1 (4)    |

| <i>n</i> (%)          | Axi-Cel       |          | SOC           |          |
|-----------------------|---------------|----------|---------------|----------|
|                       | <i>n</i> = 24 |          | <i>n</i> = 26 |          |
|                       | Any Grade     | Grade ≥3 | Any Grade     | Grade ≥3 |
| Hypocalcemia          | 7 (29)        | 0        | 1 (4)         | 0        |
| Tremor                | 8 (33)        | 0        | 0             | 0        |
| Aphasia               | 7 (29)        | 2 (8)    | 0             | 0        |
| Dizziness             | 6 (25)        | 1 (4)    | 1 (4)         | 0        |
| Hyperglycemia         | 5 (21)        | 0        | 2 (8)         | 0        |
| Hypogammaglobulinemia | 6 (25)        | 0        | 1 (4)         | 0        |
| Encephalopathy        | 5 (21)        | 3 (13)   | 1 (4)         | 0        |
| Hypoalbuminemia       | 5 (21)        | 0        | 1 (4)         | 0        |
| Hyperglycemia         | 5 (21)        | 0        | 2 (8)         | 0        |
| CRS                   | 24 (100)      | 2 (8)    | —             | —        |
| Pyrexia               | 23 (96)       | 1 (4)    | —             | —        |
| Hypotension           | 11 (46)       | 2 (8)    | —             | —        |
| Sinus tachycardia     | 8 (33)        | 1 (4)    | —             | —        |
| Hypoxia               | 7 (29)        | 4 (17)   | —             | —        |
| Chills                | 6 (25)        | 0        | —             | —        |
| Neurologic events     | 18 (75)       | 8 (33)   | 5 (19)        | 0        |
| Confusional state     | 12 (50)       | 4 (17)   | 1 (4)         | 0        |
| Tremor                | 8 (33)        | 0        | 0             | 0        |
| Aphasia               | 7 (29)        | 2 (8)    | 0             | 0        |
| Encephalopathy        | 5 (21)        | 3 (13)   | 1 (4)         | 0        |
| Somnolence            | 3 (13)        | 2 (8)    | 2 (8)         | 0        |
| Cognitive disorder    | 1 (4)         | 0        | 1 (4)         | 0        |
| Hallucination         | 0             | 0        | 1 (4)         | 0        |
| Hallucination, visual | 0             | 0        | 1 (4)         | 0        |

Shown are any adverse events of any grade that occurred in at least 20% of the patients in either the axi-cel arm or the SOC arm, as well as events of the cytokine release syndrome that occurred in at least 15% of the patients in the axi-cel arm and neurologic events of any grade that occurred in at least 15% of the patients in the axi-cel arm or at least 3% of those in the SOC arm. The severity of the cytokine release syndrome was graded according to Lee et

al.(1) Neurologic events were identified with the use of prespecified search list of preferred terms in MedDRA, version 23.1, on the basis of known neurotoxic effects associated with anti-CD19 immunotherapy, and were specifically identified with the use of methods that were based on the phase II study of blinatumomab.(2) The severity of all adverse events, including neurologic events and symptoms of the cytokine release syndrome, was graded with the use of the CTCAE, version 4.03, of the National Cancer Institute.

<sup>a</sup> Neutropenia refers to the combined preferred terms of neutropenia and neutrophil count decreased.

<sup>b</sup> Thrombocytopenia refers to the combined preferred terms of thrombocytopenia and platelet count decreased.

<sup>c</sup> Leukopenia refers to the combined preferred terms of leukopenia and white-cell count decreased.

Abbreviations: axi-cel, axicabtagene ciloleucel; CRS, cytokine release syndrome; CTCAE, Common Terminology Criteria for Adverse Events; MedDRA, Medical Dictionary for Regulatory Activities; SOC, standard of care.

1. Lee DW, Gardner R, Porter DL, Louis CU, Ahmed N, Jensen M, *et al.* Current concepts in the diagnosis and management of cytokine release syndrome. *Blood* **2014**;124(2):188-95.

2. Topp MS, Gokbuget N, Stein AS, Zugmaier G, O'Brien S, Bargou RC, *et al.* Safety and activity of blinatumomab for adult patients with relapsed or refractory B-precursor acute lymphoblastic leukaemia: a multicentre, single-arm, phase 2 study. *Lancet Oncol* **2015**;16(1):57-66.

**Supplementary Table S9. Deaths in axi-cel and SOC arms for patients ≥70 years**

| <b>Reason for death, <i>n</i> (%)</b> | <b>Axi-Cel<br/><i>n</i> = 24</b> | <b>SOC<br/><i>n</i> = 26</b> |
|---------------------------------------|----------------------------------|------------------------------|
| Progressive disease                   | 12 (50)                          | 13 (50)                      |
| Fatal adverse event                   | 1 (4)                            | 1 (4) <sup>a</sup>           |
| COVID-19                              | 1 (4)                            | 0                            |
| Other                                 | 0                                | 1 (4) <sup>b</sup>           |

<sup>a</sup> Due to cardiac arrest (related to high-dose chemotherapy). <sup>b</sup> Due to sepsis.

Abbreviations: axi-cel, axicabtagene ciloleucel; SOC, standard of care.

**Supplementary Table S10. Baseline characteristics for quality-of-life analysis in patients ≥65 years<sup>a</sup>**

| Characteristic                                                                        | Axi-Cel<br><i>n</i> = 46 | SOC<br><i>n</i> = 42 | Overall<br><i>N</i> = 88 |
|---------------------------------------------------------------------------------------|--------------------------|----------------------|--------------------------|
| Median age (range), years                                                             | 69 (65-80)               | 69 (65-78)           | 69 (65-80)               |
| Male sex, <i>n</i> (%)                                                                | 24 (52)                  | 28 (67)              | 52 (59)                  |
| Race or ethnic group, <i>n</i> (%) <sup>b</sup>                                       |                          |                      |                          |
| American Indian or Alaska Native                                                      | 0                        | 1 (2)                | 1 (1)                    |
| Asian                                                                                 | 2 (4)                    | 1 (2)                | 3 (3)                    |
| White                                                                                 | 42 (91)                  | 40 (95)              | 82 (93)                  |
| Other                                                                                 | 2 (4)                    | 0                    | 2 (2)                    |
| Hispanic or Latino ethnic group, <i>n</i> (%) <sup>b</sup>                            |                          |                      |                          |
| Yes                                                                                   | 2 (4)                    | 3 (7)                | 5 (6)                    |
| No                                                                                    | 43 (93)                  | 38 (90)              | 81 (92)                  |
| Not reported                                                                          | 1 (2)                    | 1 (2)                | 2 (2)                    |
| ECOG performance status score of 1, <i>n</i> (%) <sup>c</sup>                         | 25 (54)                  | 13 (31)              | 38 (43)                  |
| Disease stage, <i>n</i> (%)                                                           |                          |                      |                          |
| I-II                                                                                  | 7 (15)                   | 9 (21)               | 16 (18)                  |
| III-IV                                                                                | 39 (85)                  | 33 (79)              | 72 (82)                  |
| sAAIPI of 2-3, <i>n</i> (%) <sup>d, e</sup>                                           | 23 (50)                  | 9 (21)               | 32 (36)                  |
| Molecular subgroup according to central laboratory, <i>n</i> (%) <sup>f</sup>         |                          |                      |                          |
| Germinal center B-cell–like                                                           | 29 (63)                  | 28 (67)              | 57 (65)                  |
| Activated B-cell–like                                                                 | 3 (7)                    | 2 (5)                | 5 (6)                    |
| Unclassified                                                                          | 4 (9)                    | 2 (5)                | 6 (7)                    |
| Not applicable                                                                        | 6 (13)                   | 6 (14)               | 12 (14)                  |
| Missing data                                                                          | 4 (9)                    | 4 (10)               | 8 (9)                    |
| Disease type according to central laboratory, <i>n</i> (%)                            |                          |                      |                          |
| DLBCL not otherwise specified/without further classification possible <sup>g, h</sup> | 31 (67)                  | 35 (83)              | 66 (75)                  |
| HGBL, including rearrangement of <i>MYC</i> with <i>BCL2</i> or <i>BCL6</i> or both   | 11 (24)                  | 3 (7)                | 14 (16)                  |
| Not confirmed or missing data                                                         | 3 (7)                    | 2 (5)                | 5 (6)                    |

| Characteristic                                                                   | Axi-Cel<br>n = 46   | SOC<br>n = 42       | Overall<br>N = 88   |
|----------------------------------------------------------------------------------|---------------------|---------------------|---------------------|
| Other                                                                            | 1 (2)               | 2 (5)               | 3 (3)               |
| Disease type according to the investigator,<br>n (%)                             |                     |                     |                     |
| DLBCL not otherwise specified                                                    | 25 (54)             | 32 (76)             | 57 (65)             |
| T-cell/histiocyte-rich LBCL                                                      | 0                   | 1 (2)               | 1 (1)               |
| Large cell transformation from follicular<br>lymphoma <sup>i</sup>               | 7 (15)              | 6 (14)              | 13 (15)             |
| HGBL with/without <i>MYC</i> and <i>BCL2</i><br>and/or <i>BCL6</i> rearrangement | 14 (30)             | 3 (7)               | 17 (19)             |
| Prognostic marker according to central<br>laboratory, n (%)                      |                     |                     |                     |
| HGBL, double- or triple-hit                                                      | 11 (24)             | 3 (7)               | 14 (16)             |
| Double-expressor lymphoma                                                        | 19 (41)             | 19 (45)             | 38 (43)             |
| <i>MYC</i> rearrangement                                                         | 3 (7)               | 0                   | 3 (3)               |
| Not applicable                                                                   | 13 (28)             | 19 (45)             | 32 (36)             |
| Missing data                                                                     | 0                   | 1 (2)               | 1 (1)               |
| Response to 1L therapy, n (%) <sup>e</sup>                                       |                     |                     |                     |
| Primary refractory                                                               | 32 (70)             | 24 (57)             | 56 (64)             |
| Relapse ≤12 months after initiation or<br>completion of 1L therapy               | 14 (30)             | 18 (43)             | 32 (36)             |
| Bone marrow involvement, n (%) <sup>j</sup>                                      | 1 (2)               | 3 (7)               | 4 (5)               |
| Elevated LDH level, n (%) <sup>k</sup>                                           | 27 (59)             | 14 (33)             | 41 (47)             |
| Median tumor burden (range), mm <sup>2l</sup>                                    | 1826<br>(181-22538) | 1657<br>(252-16649) | 1762<br>(181-22538) |

<sup>a</sup> Patients were randomly assigned to receive axi-cel or SOC. Percentages may not total 100 because of rounding.

<sup>b</sup> Race and ethnic group were determined by the investigator.

<sup>c</sup> Eastern Cooperative Oncology Group (ECOG) performance-status scores are assessed on a 5-point scale, with a score of 0 indicating no symptoms and higher scores indicating greater disability. A score of 1 indicates that the patient is ambulatory but restricted from strenuous activity. Only patients with an ECOG performance status score of 0-1 were included in the study.

<sup>d</sup> Values are the sAAIPI at randomization, which were similar to the sAAIPI according to the investigator as entered into the clinical database. The sAAIPI is used to assess prognostic risk on the basis of various factors after adjustment for patient age and extranodal status at the time of diagnosis of refractory disease; risk categories are assessed as low (0 factors), intermediate (1 factor), or high (2 or 3 factors).

<sup>e</sup> As reported by investigator at time of randomization via Interactive Voice/Web Response System.

<sup>f</sup> The molecular subgroup as assessed by the investigator was as follows: germinal center B-cell–like in 25 patients (54%) in the axi-cel arm, 15 (36%) in the standard-care arm, and 40 (45%) overall; non–germinal center B-cell–like in 14 (30%), 16 (38%), and 30 (34%), respectively. The molecular subgroup was not assessed in 7 patients (15%) in the axi-cel arm, 11 (26%) in the standard-care arm, and 18 (20%) overall.

<sup>g</sup> The definition of diffuse large B-cell lymphoma according to the central laboratory included cases of incomplete evaluation that were due to inadequate sample amount or sample type, for which further classification of the subtype was not possible. Diffuse large B-cell lymphoma, not otherwise specified, according to the World Health Organization 2016 definition,<sup>(1)</sup> is also included.

<sup>h</sup> The definition of diffuse large B-cell lymphoma according to the central laboratory included cases of incomplete evaluation that were due to inadequate sample amount or sample type, for which further classification of the subtype

was not possible. Diffuse large B-cell lymphoma, not otherwise specified, according to the World Health Organization 2016 definition, is also included.

<sup>i</sup> Transformation was defined as the presence of large cells noted anywhere in the biopsy sample.

<sup>j</sup> The data shown were as collected on the diagnosis history case-report form.

<sup>k</sup> An elevated lactate dehydrogenase level was defined as a level that was above the upper limit of the normal range per local laboratory reference range.

<sup>l</sup> Tumor burden was determined on the basis of the sum of product diameters of the target lesions, according to the Cheson criteria,<sup>(2)</sup> and was assessed by the central laboratory.

Abbreviations: 1L, first-line; axi-cel, axicabtagene ciloleucel; DLBCL, diffuse large B-cell lymphoma; ECOG, Eastern Cooperative Oncology Group; HGBL, high-grade B-cell lymphoma; LBCL, large B-cell lymphoma; LDH, lactate dehydrogenase; sAAIPI, Second-line Age-Adjusted International Prognostic Index; SOC, standard of care.

1. Swerdlow SH, Campo E, Pileri SA, Harris NL, Stein H, Siebert R, *et al.* The 2016 revision of the World Health Organization classification of lymphoid neoplasms. *Blood* **2016**;127(20):2375-90.

2. Cheson BD, Pfistner B, Juweid ME, Gascoyne RD, Specht L, Horning SJ, *et al.* Revised response criteria for malignant lymphoma. *J Clin Oncol* **2007**;25(5):579-86.

**Supplementary Table S11. Mixed model with repeated measures estimated difference in change from baseline for prespecified patient-reported outcomes measures (quality-of-life analysis set) in patients ≥65 years**

|                                        |          | Model 1:<br>Base model            |                                    |                                  | Sensitivity analyses |                                    |                                  | Model 3:<br>Pattern mixture + covariates |                                    |                                  |
|----------------------------------------|----------|-----------------------------------|------------------------------------|----------------------------------|----------------------|------------------------------------|----------------------------------|------------------------------------------|------------------------------------|----------------------------------|
|                                        |          | Model 2:<br>Pattern mixture model |                                    |                                  |                      |                                    |                                  |                                          |                                    |                                  |
| PRO score                              | Visit    | Estimate<br>(95% CI)              | Unadjusted<br>P value <sup>a</sup> | Adjusted<br>P value <sup>a</sup> | Estimate<br>(95% CI) | Unadjusted<br>P value <sup>a</sup> | Adjusted<br>P value <sup>a</sup> | Estimate<br>(95% CI)                     | Unadjusted<br>P value <sup>a</sup> | Adjusted<br>P value <sup>a</sup> |
| EORTC QLQ-C30 Physical Functioning     | Day 100  | 15.3 (6.8, 23.7)                  | 0.0006                             | 0.0019                           | 16.4 (7.5, 25.3)     | 0.0004                             | 0.0011                           | 15.2 (5.4, 25.0)                         | 0.0030                             | 0.0074                           |
|                                        | Day 150  | 11.3 (1.7, 21.0)                  | 0.0220                             | 0.0419                           | 11.9 (2.2, 21.7)     | 0.0168                             | 0.0251                           | 10.8 (0.7, 20.9)                         | 0.0359                             | 0.0513                           |
|                                        | Month 9  | 13.0 (1.9, 24.2)                  | 0.0226                             | 0.0419                           | 13.6 (2.4, 24.8)     | 0.0176                             | 0.0251                           | 12.7 (1.3, 24.0)                         | 0.0291                             | 0.0485                           |
|                                        | Month 12 | -0.2 (-14.6, 14.2)                | 0.9746                             | 0.9746                           | 0.2 (-14.2, 14.6)    | 0.9760                             | 0.9760                           | -0.7 (-15.2, 13.7)                       | 0.9190                             | 0.9190                           |
|                                        | Month 15 | 2.5 (-11.7, 16.7)                 | ND                                 | ND                               | 3.4 (-10.9, 17.7)    | ND                                 | ND                               | 2.0 (-12.7, 16.6)                        | ND                                 | ND                               |
| EORTC QLQ-C30 Global Health Status/QoL | Day 100  |                                   |                                    |                                  |                      |                                    |                                  |                                          |                                    |                                  |
|                                        | Day 150  | 27.5 (16.2, 38.8)                 | <.0001                             | <.0001                           | 25.7 (13.8, 37.7)    | <.0001                             | 0.0003                           | 22.2 (9.5, 35.0)                         | 0.0009                             | 0.0044                           |
|                                        | Month 9  | 22.5 (8.5, 36.5)                  | 0.0020                             | 0.0052                           | 20.8 (6.2, 35.4)     | 0.0057                             | 0.0115                           | 17.2 (2.5, 32.0)                         | 0.0230                             | 0.0459                           |
|                                        | Month 12 | 13.4 (0.3, 26.4)                  | 0.0456                             | 0.0633                           | 12.0 (-1.6, 25.5)    | 0.0820                             | 0.0911                           | 8.7 (-5.2, 22.6)                         | 0.2145                             | 0.2383                           |
|                                        | Month 15 | 8.1 (-7.2, 23.4)                  | 0.2967                             | 0.3214                           | 6.6 (-9.3, 22.5)     | ND                                 | ND                               | 3.1 (-12.9, 19.2)                        | ND                                 | ND                               |
| EQ-5D-5L VAS                           | Day 100  | 9.7 (-3.9, 23.2)                  | ND                                 | ND                               | 8.5 (-5.6, 22.5)     | ND                                 | ND                               | 4.6 (-10.4, 19.7)                        | ND                                 | ND                               |
|                                        | Day 150  |                                   |                                    |                                  |                      |                                    |                                  |                                          |                                    |                                  |
|                                        | Month 9  | 19.9 (12.1, 27.7)                 | <.0001                             | <.0001                           | 18.9 (10.5, 27.2)    | <.0001                             | 0.0002                           | 17.8 (8.8, 26.9)                         | 0.0002                             | 0.0020                           |
|                                        | Month 12 | 19.5 (10.0, 29.1)                 | ND                                 | ND                               | -0.2 (-6.9, 6.5)     | ND                                 | ND                               | -2.6 (-9.4, 4.2)                         | ND                                 | ND                               |
|                                        | Month 15 | 10.8 (0.1, 21.4)                  | ND                                 | ND                               | -3.9 (-11.1, 3.3)    | ND                                 | ND                               | -6.3 (-13.5, 1.0)                        | ND                                 | ND                               |

Results populated only through month 15 due to lack of model convergence when using time points. Model 1 included variables for treatment, time, and treatment by time interaction (primary analysis) and controlled for response to first-line therapy (primary refractory, relapse ≤6 months of first-line therapy, relapse >6 and ≤12 months of first-line therapy) and age-adjusted IPI (0 to 1 vs 2 to 3) at time of screening. Model 2 included all variables in Model 1 with additional covariates to control for patterns of missingness through Day 150. Model 3 included all variables in Model 2 with additional covariates for: geographic region (rest of world, United States); ECOG performance status at screening (0, 1); sex; race/ethnicity (Asian, Black or African American, Other, White); disease type (diffuse large B-cell lymphoma, HGBL with or without MYC and BCL2 and/or BCL6 rearrangement, large-cell transformation from follicular lymphoma, other); molecular subgroup (germinal center B-cell like, non-germinal center B-cell like, not tested); and double/triple-hit status (double expressor lymphoma, HGBL-double hit, HGBL-triple hit, missing).

<sup>a</sup> P values only presented for Day 100 and only for subsequent visits when the previous visit was statistically significant (P<.05). Adjusted P values were calculated using the false discovery rate methodology.

Abbreviations: ECOG, Eastern Cooperative Oncology Group; EORTC, European Organization for Research and Treatment of Cancer; EQ-5D-5L, EuroQoL 5-dimension questionnaire using a 5-level scale; QLQ-C30, Quality of Life Questionnaire-Core 30; HGBL, high-grade B-cell lymphoma; IPI, International Prognostic Index; MMRM, mixed-effect model with repeated measures; ND, not displayed; VAS, visual analogue scale.
